# Supplementary material
Source: PubMed Central journal article supplement (PMC10100639)
Supplement: 41582_2023_800_MOESM1_ESM.pdf [file 41582_2023_800_MOESM1_ESM.pdf]

# Bruton tyrosine kinase inhibitors for multiple sclerosis

---

In the format provided by the authors and unedited

**Supplementary Table 1 | Clinical trials of BTK inhibitors in patients with autoimmune and malignant conditions.**

| Therapeutic indication                         | Phase | Notable trials (ClinicalTrials.gov Identifier)      | Status     |
|------------------------------------------------|-------|-----------------------------------------------------|------------|
| <b><i>Evobrutinib</i></b>                      |       |                                                     |            |
| Rheumatoid arthritis                           | 2     | NCT03233230, NCT02784106                            | Complete   |
| SLE                                            | 2     | NCT02975336                                         | Terminated |
| SLE                                            | 1     | NCT02537028                                         | Complete   |
| <b><i>Tolebrutinib</i></b>                     |       |                                                     |            |
| Myasthenia gravis                              | 3     | NCT05132569                                         | Terminated |
| <b><i>Fenebrutinib</i></b>                     |       |                                                     |            |
| SLE                                            | 2     | NCT02908100                                         | Complete   |
| Urticaria                                      | 2     | NCT03693625                                         | Terminated |
| B cell lymphoma, chronic lymphocytic leukaemia | 1     | NCT01991184                                         | Completed  |
| <b><i>Remibrutinib</i></b>                     |       |                                                     |            |
| Chronic spontaneous urticaria                  | 3     | NCT05170724, NCT05048342, NCT05032157, NCT05030311  | Ongoing    |
| <b><i>Orelabrutinib</i></b>                    |       |                                                     |            |
| Immune thrombocytopenia                        | 2     | NCT05232149, NCT05020288                            | Planned    |
| Immune thrombocytopenia                        | 1–2   | NCT05124028                                         | Planned    |
| Primary CNS lymphoma                           | 2     | NCT05209620 <sup>a</sup> , NCT04899427 <sup>b</sup> | Ongoing    |
| Primary CNS lymphoma                           | 1–2   | NCT04961515 <sup>c</sup> , NCT04831658 <sup>d</sup> | Ongoing    |
| Primary CNS lymphoma                           | 1–2   | NCT05021770 <sup>e</sup>                            | Planned    |
| Primary CNS lymphoma                           | 1     | NCT05036577 <sup>f</sup>                            | Recruiting |
| Follicular lymphoma                            | 2     | NCT04989621 <sup>g</sup>                            | Ongoing    |
| B cell lymphoma                                | 3     | NCT05097443 <sup>h</sup>                            | Ongoing    |
| B cell lymphoma                                | 2     | NCT05014100 <sup>i</sup>                            | Planned    |
| B cell lymphoma                                | 1–2   | NCT04304040 <sup>j</sup> , NCT04014205              | Ongoing    |
| Non-Hodgkin lymphoma                           | 1–2   | NCT05021770 <sup>e</sup>                            | Planned    |
| Mantle cell lymphoma                           | 3     | NCT05051891 <sup>h</sup>                            | Planned    |
| Mantle cell lymphoma                           | 2     | NCT05076097 <sup>k</sup>                            | Ongoing    |
| SLE                                            | 1–2   | NCT04305197                                         | Ongoing    |

Trials were identified on clinicaltrials.gov up to January 2022 (excluding trials in healthy volunteers and pharmacokinetic trials in patients with hepatic or renal impairment). BTK, Bruton tyrosine kinase; CNS, central nervous system; SLE, systemic lupus erythematosus. <sup>a</sup>Combination therapy with pemetrexed. <sup>b</sup>Combination therapy with sintilimab and tislelizumab. <sup>c</sup>Combination therapy with sintilimab. <sup>d</sup>Combination therapy with PD-1 monoclonal antibody and fotemustine. <sup>e</sup>Combination therapy with thiotepa. <sup>f</sup>Combination therapy with rituximab, methotrexate, and dexamethasone. <sup>g</sup>Combination therapy with rituximab. <sup>h</sup>Combination therapy with rituximab and combination chemotherapy. <sup>i</sup>Combination therapy with lenalidomide. <sup>j</sup>Combination therapy with recombinant humanized monoclonal antibody MIL62. <sup>k</sup>Combination therapy with lenalidomide and rituximab.
